# Supplementary material for: Distribution of selenium in zebrafish larvae after exposure to organic and inorganic selenium forms
Source: Royal Society of Chemistry journal article supplement (doi:10.1039/c5mt00279f), 2016-01-01
Supplement: c5mt00279f1.pdf [file c5mt00279f1.pdf]

Electronic Supplementary Information For:

## **Distribution of Selenium in Zebrafish Larvae after Exposure to Organic and Inorganic Selenium Forms**

N. V. Dolgova,<sup>a</sup> M. J. Hackett,<sup>a</sup> T. C. MacDonald,<sup>abc</sup> S. Nehzati,<sup>a</sup> A. K. James,<sup>abc</sup>  
P. H. Krone,<sup>cb</sup> G. N. George<sup>abd</sup> and I. J. Pickering<sup>abd</sup>

---

<sup>a</sup> *Molecular and Environmental Science Research Group, Department of Geological Sciences, University of Saskatchewan, Saskatoon, SK, S7N 5E2, Canada. E-mail: ingrid.pickering@usask.ca.*

<sup>b</sup> *Toxicology Centre, University of Saskatchewan, Saskatoon, SK, S7N 5B3, Canada*

<sup>c</sup> *Department of Anatomy and Cell Biology, University of Saskatchewan, Saskatoon, SK, S7N 5E5, Canada.*

<sup>d</sup> *Department of Chemistry, University of Saskatchewan, Saskatoon, SK, S7N 5C9, Canada.*

— 4 Pages – Figures S1 to S5 —

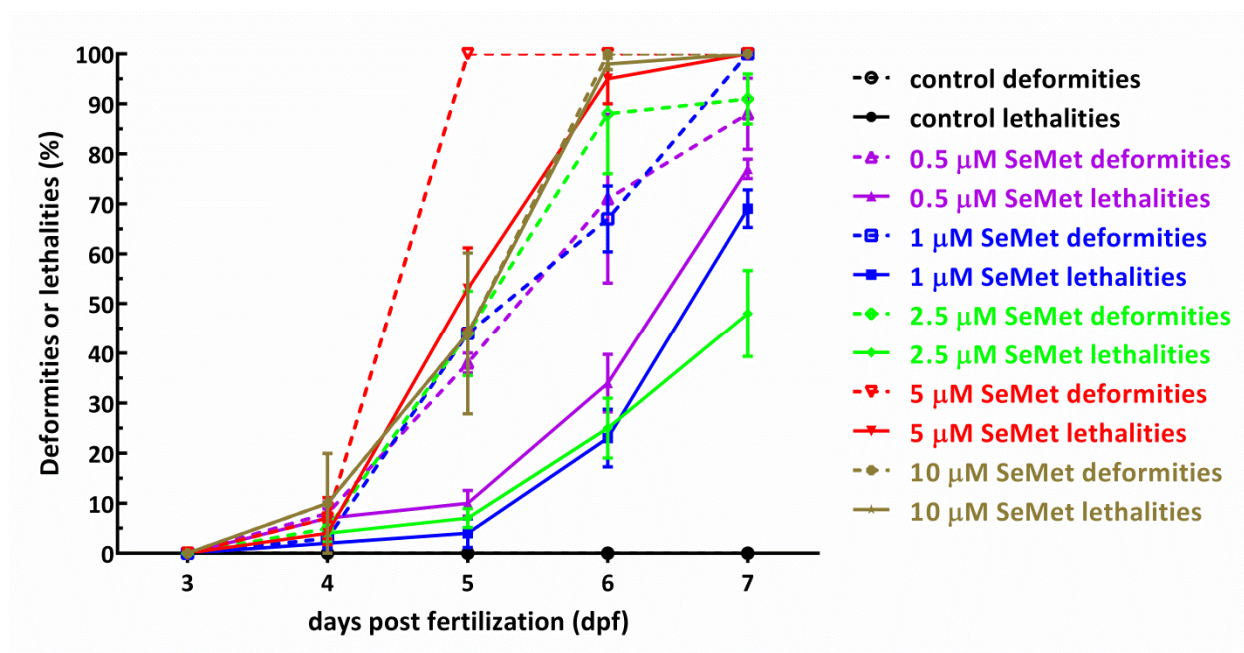

**Figure S1.** Deformities (solid lines) and lethality (dashed lines) of zebrafish larvae in the presence of different concentrations of L-selenomethionine in the embryo culture media.

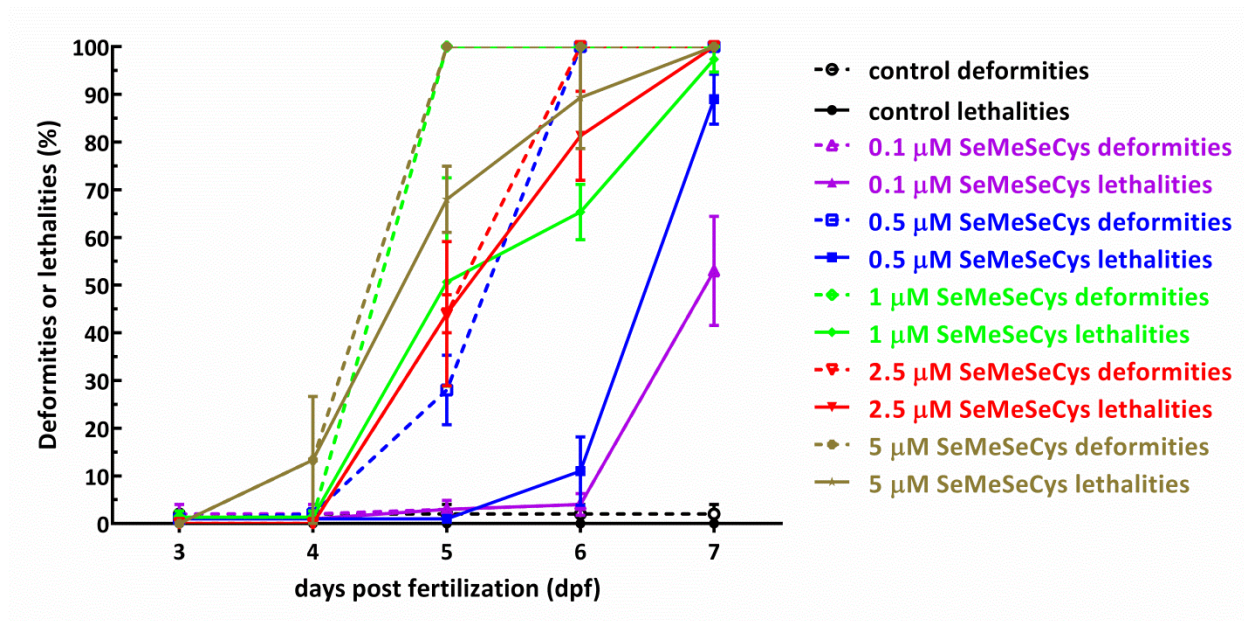

**Figure S2.** Deformities (solid lines) and lethality (dashed lines) of zebrafish larvae in the presence of different concentrations of Se-methyl-L-selenocysteine in the embryo culture media.

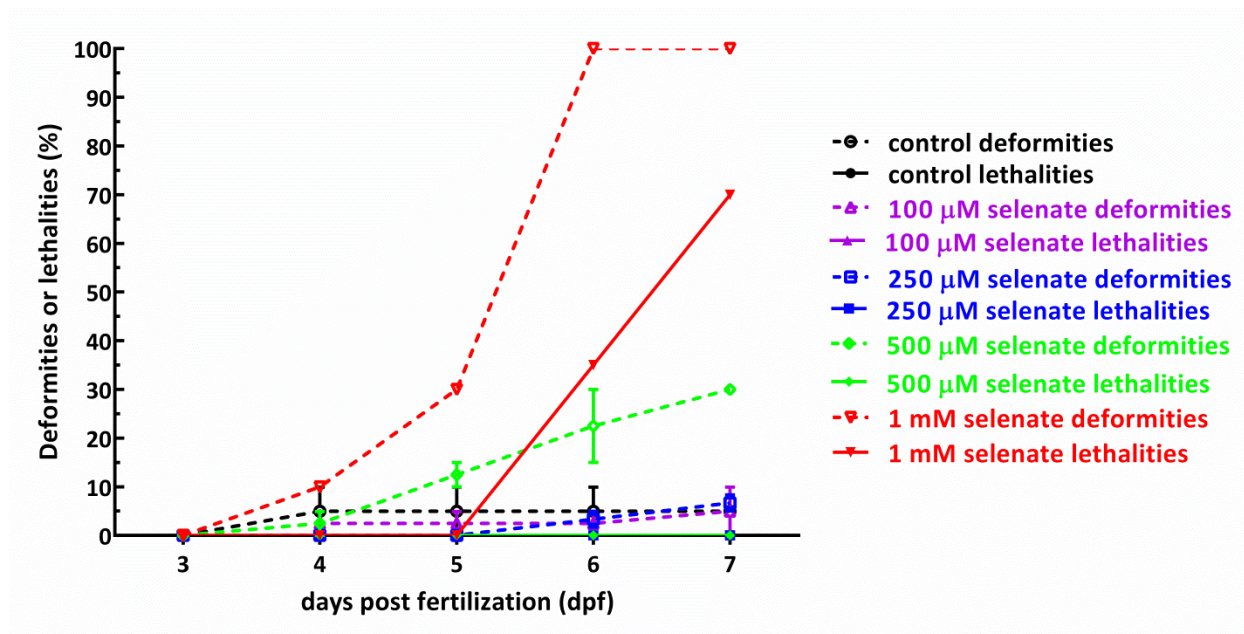

**Figure S3.** Deformities (solid lines) and lethality (dashed lines) of zebrafish larvae in the presence of different concentrations of selenate in the embryo culture media.

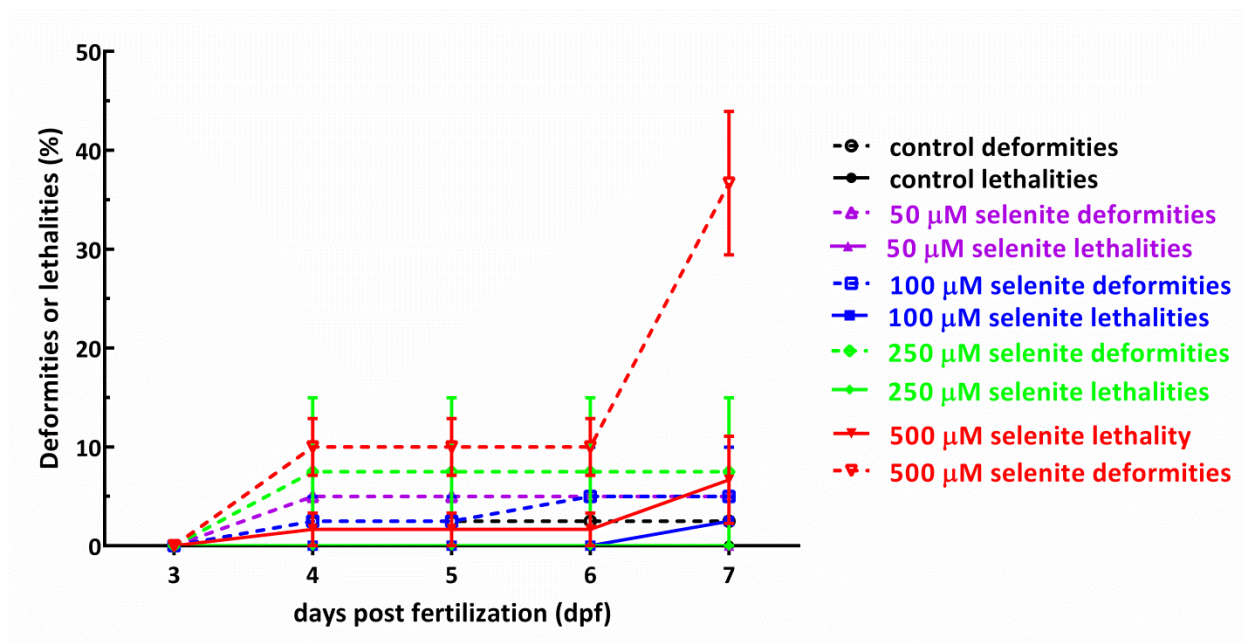

**Figure S4.** Deformities (solid lines) and lethality (dashed lines) of zebrafish larvae in the presence of different concentrations of selenite in the embryo culture media.

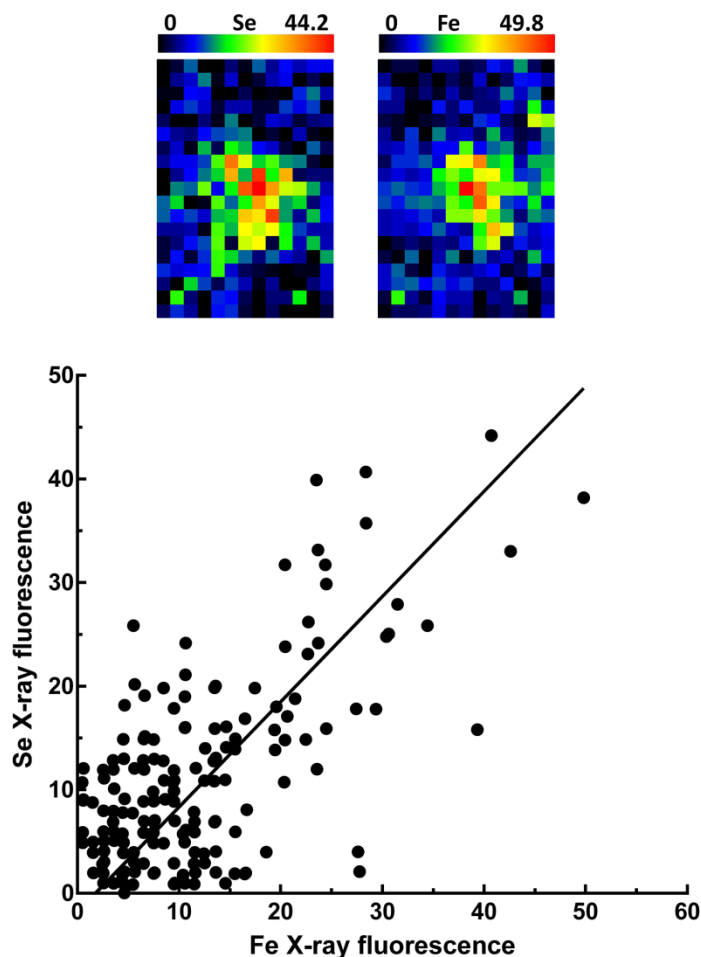

**Figure S5.** XFI of the heart region of a selenomethionine-treated zebrafish larva showing iron and selenium (upper panels). Pixels are  $5\ \mu\text{m} \times 5\ \mu\text{m}$ . The intensity scales show background-subtracted X-ray fluorescence counts, normalized to incident intensity (arbitrary units). The correlation plot (lower panel) shows selenium versus iron X-ray fluorescence counts (both following background subtraction and normalization to incident intensity). The correlation between selenium and iron is significant with  $R^2=0.44$  (after rejecting the lower 10%,  $R^2=0.50$ ).
